# Supplementary material for: Immune-related adverse events for anti-PD-1 and anti-PD-L1 drugs: systematic review and meta-analysis
Source: PubMed Central journal article supplement — BMJ. 2018 Mar 14;360:k793. doi: 10.1136/bmj.k793 (PMC5851471; doi:10.1136/bmj.k793), 2018-03-14

## Appendix Figure. Funnel Plots

---

Hypothyroidism

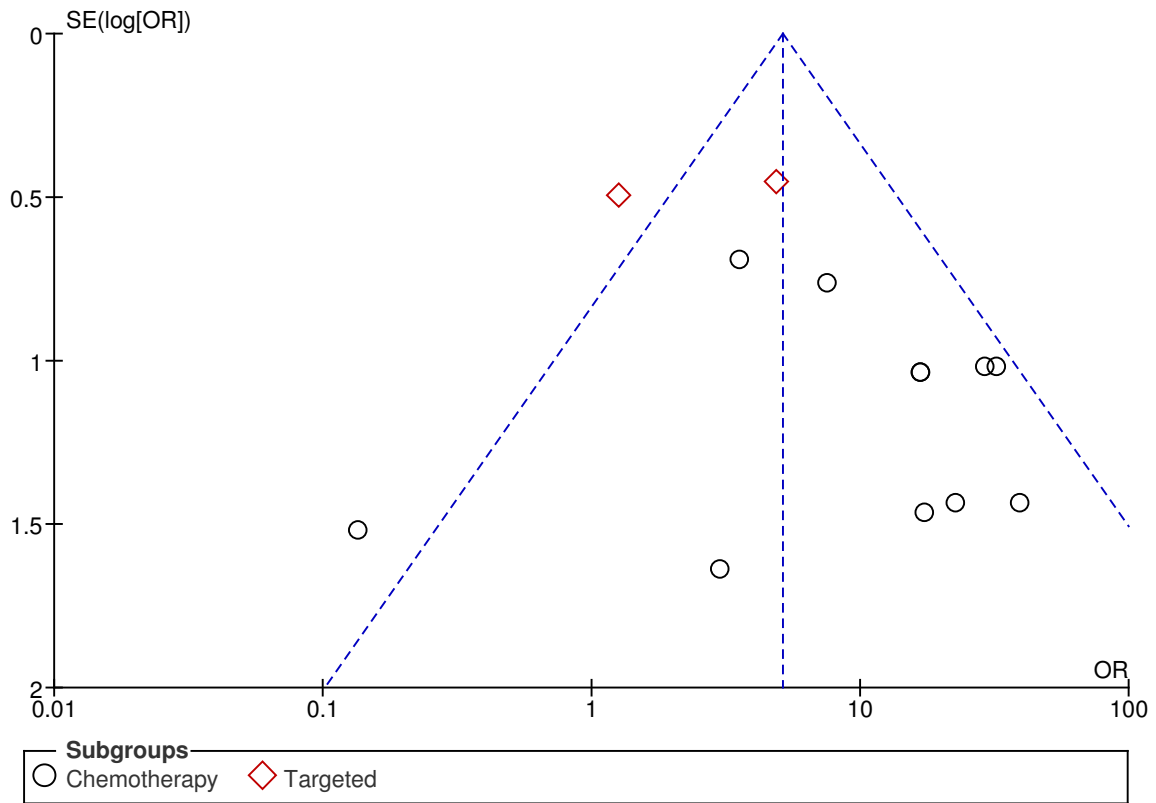

# Pneumonitis

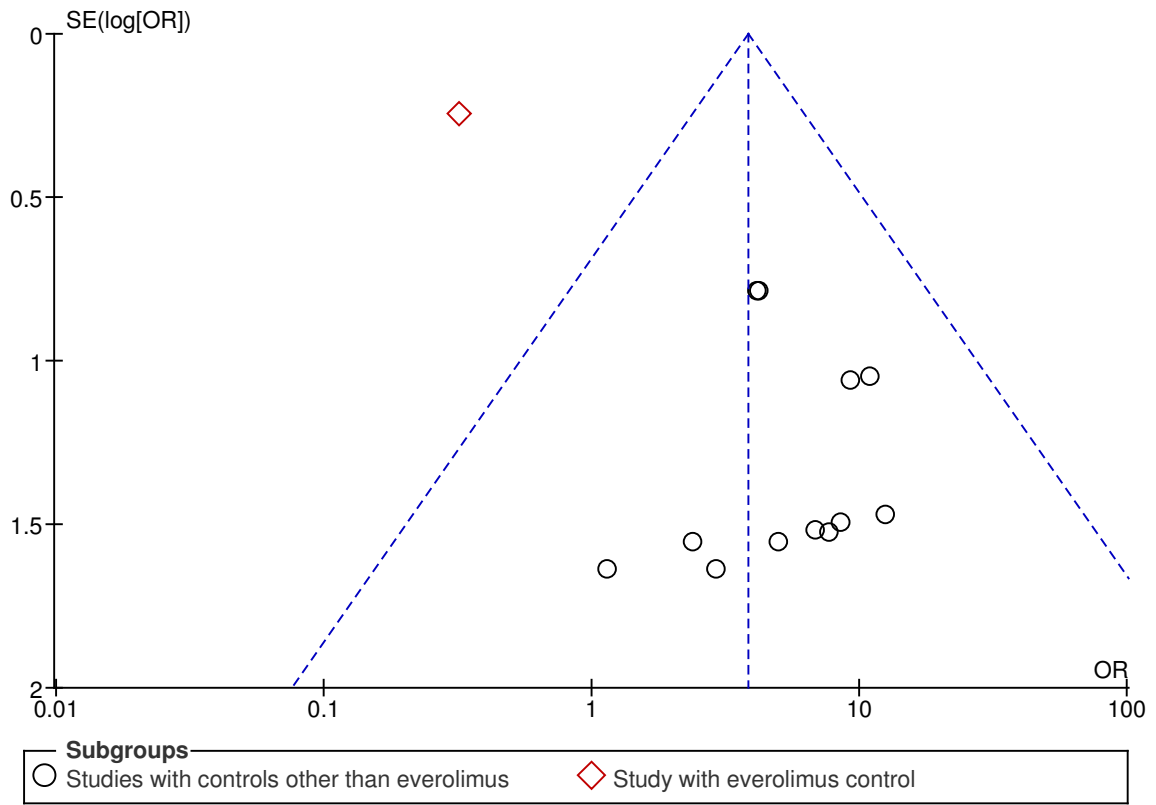

# Colitis

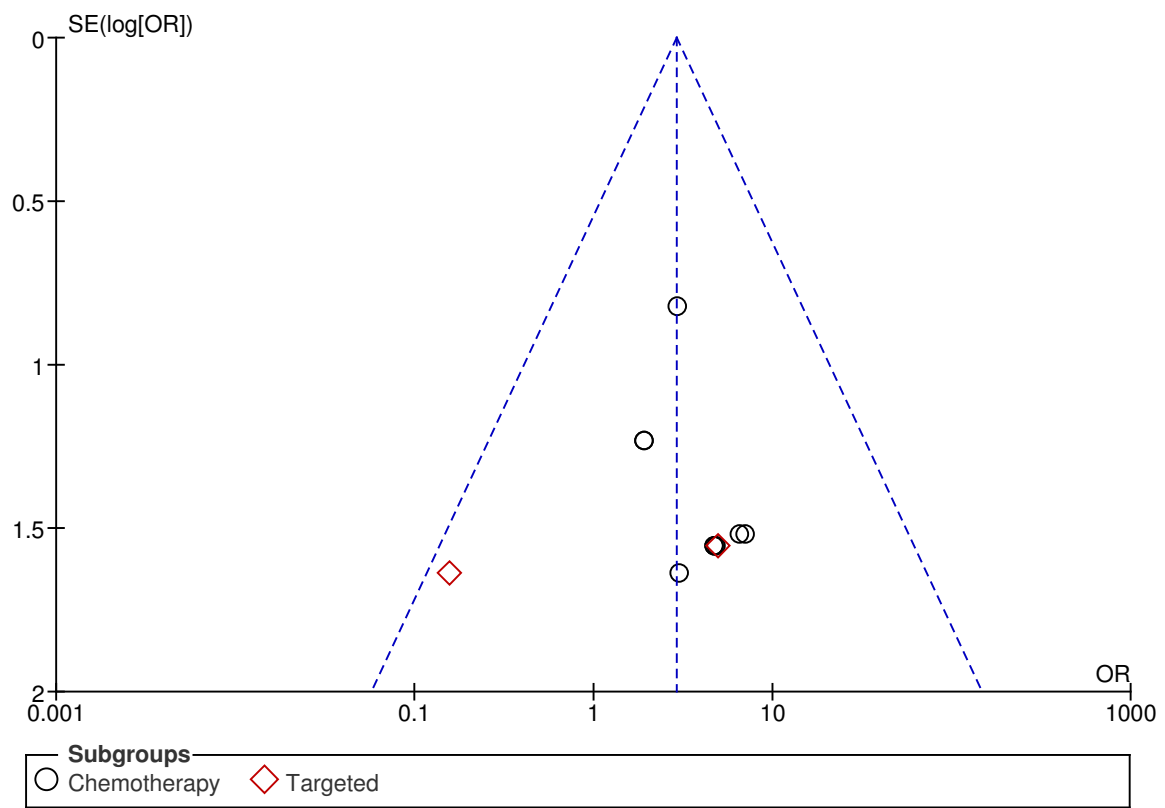

# Hepatitis

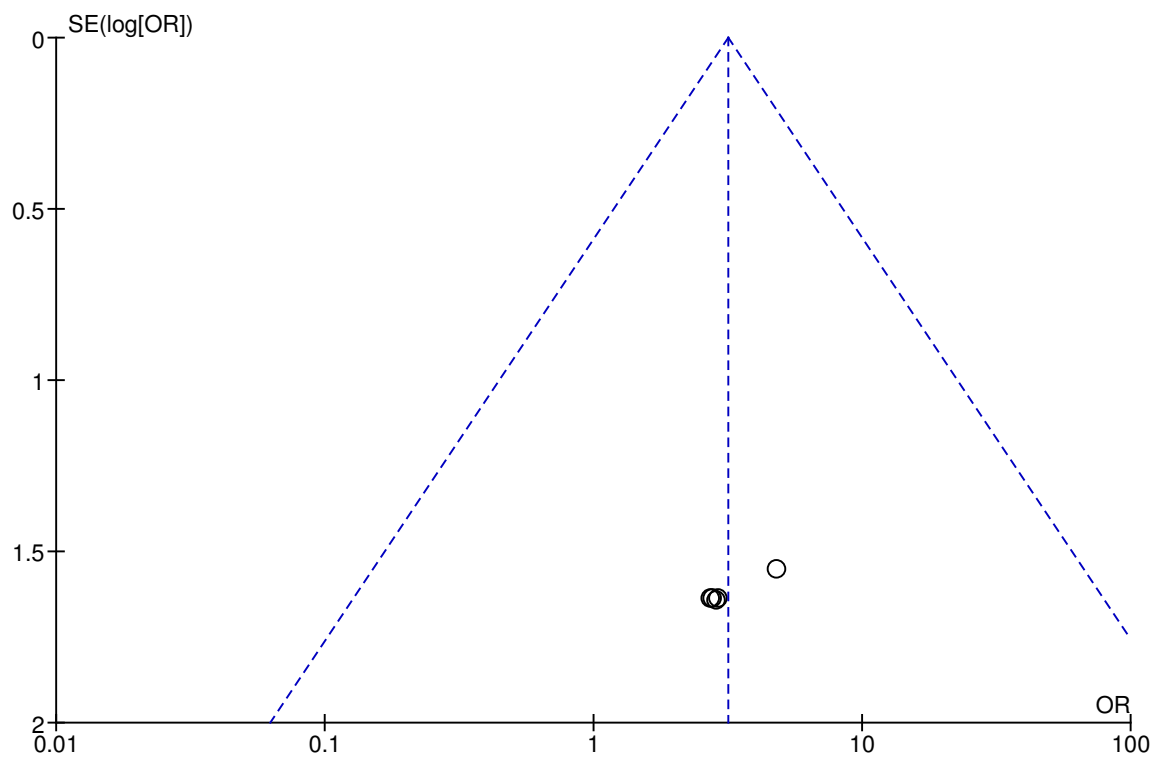

# Rash

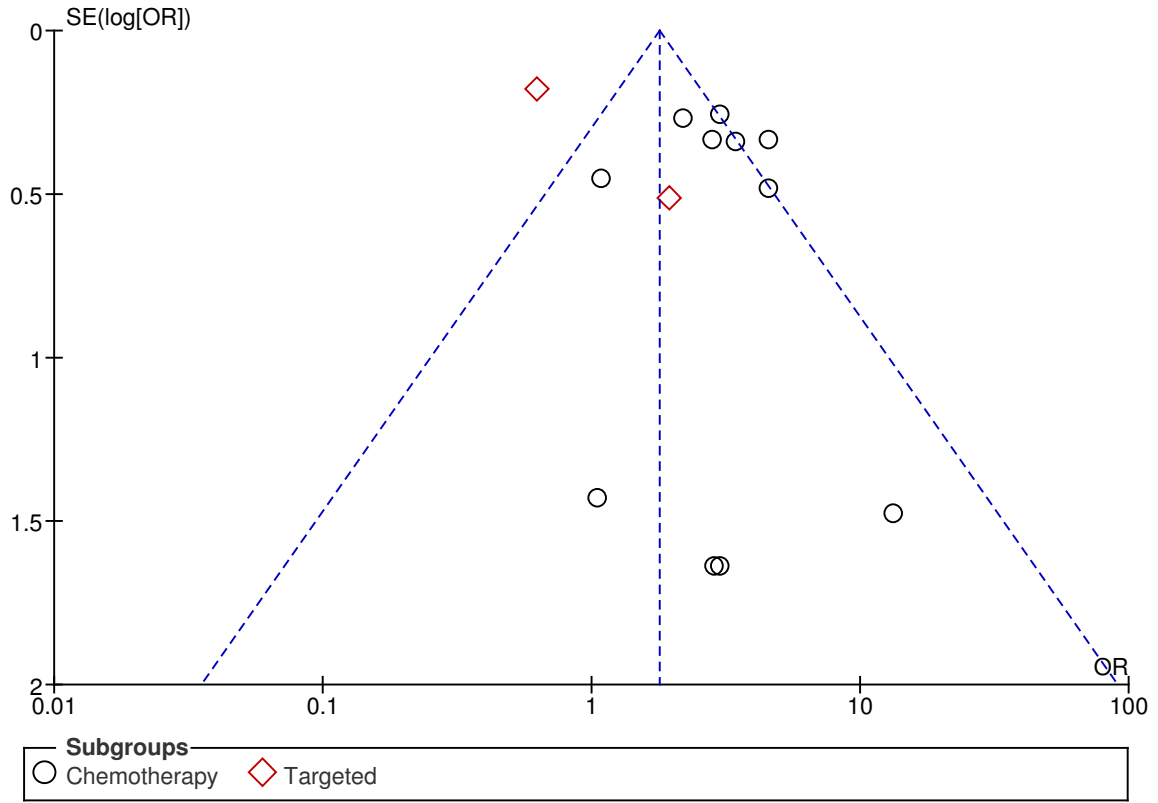

Fatigue

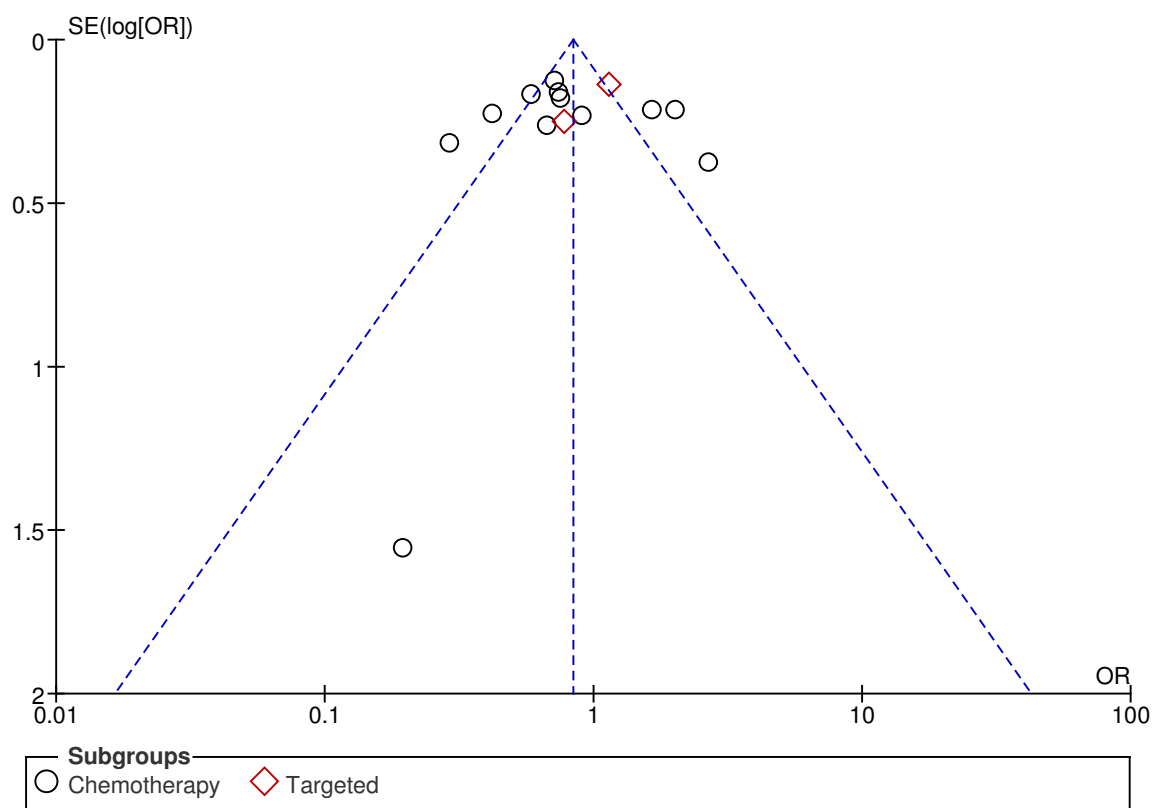

# Diarrhea

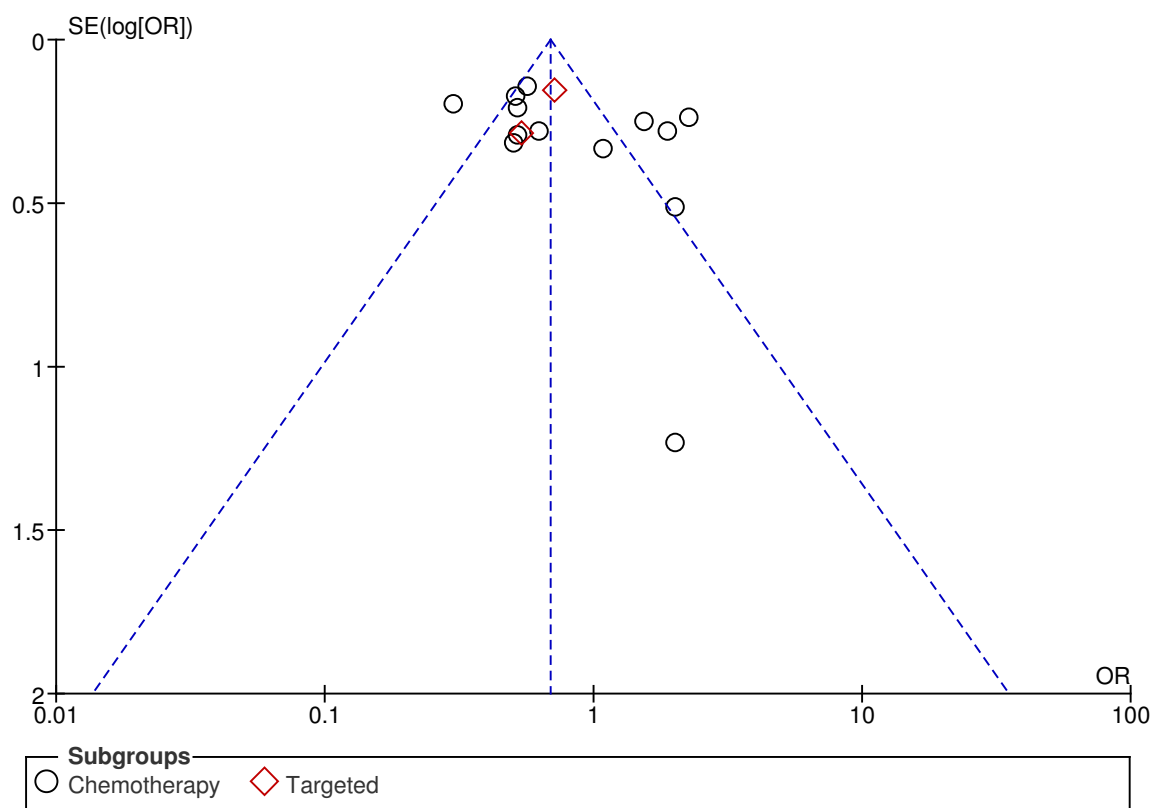

### Funnel Plot of Hypophysitis in Patients Treated with Anti-PD1 Agents Versus Control

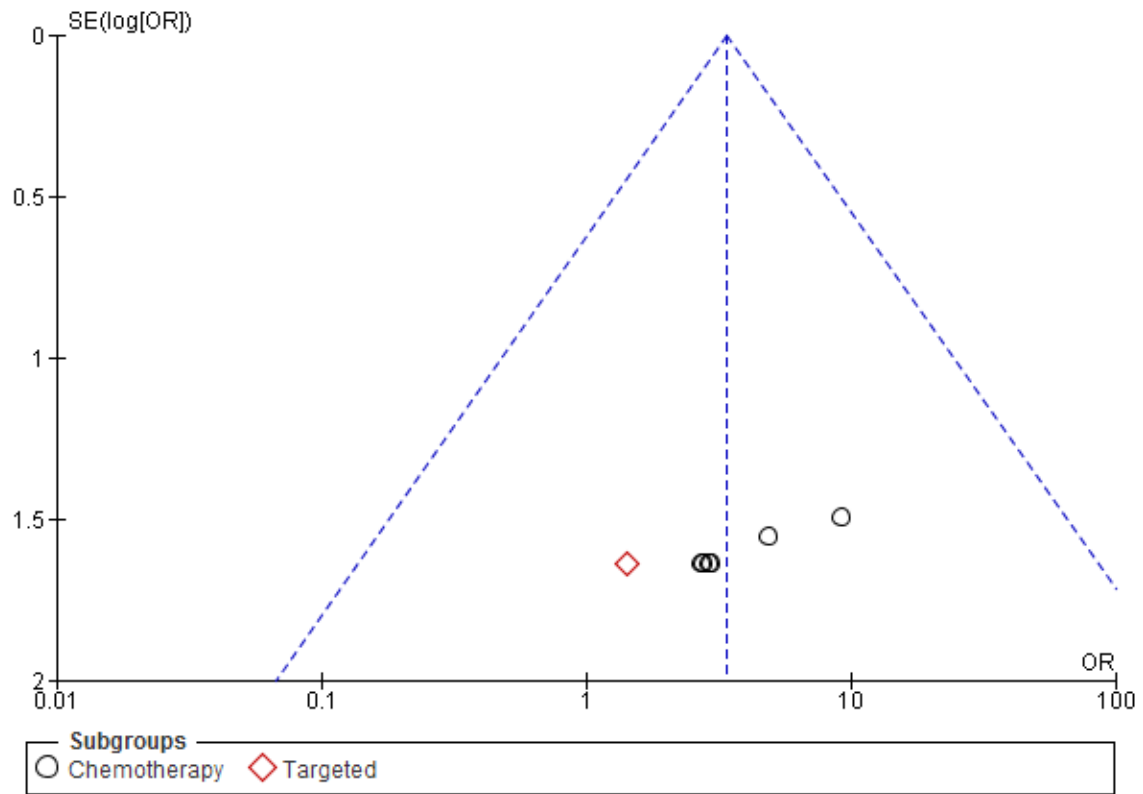

Supplement: kore041528.ww1.pdf [file kore041528.ww1.pdf]
